# Supplementary material for: Biodiversity and Ecosystem Function under Simulated Gradient Warming and Grazing
Source: MDPI journal article supplement (doi:10.3390/plants11111428), 2022-05-27
Supplement: s1 [file s1]

**Table S1** Effects of gradient warming and simulated grazing on environmental factors, biodiversity and ecosystem function

|                   | Gradient warming |                 |                  |                 |                 | Grazing         |                 | W×G                  |
|-------------------|------------------|-----------------|------------------|-----------------|-----------------|-----------------|-----------------|----------------------|
|                   | CK               | A               | B                | C               | D               | NG              | G               |                      |
| T.AG5             | 1.14±0.87b       | 1.09±0.79b      | 3.18±1.62a       | 2.09±1.13ab     | 2.16±0.59ab     | 1.72±0.95a      | 2.15±1.53a      | <i>P</i> =0.24       |
| T.AG10            | 1.55±1.91a       | 1.48±2.15a      | 2.48±1.69a       | 2.87±1.61a      | 3.38±2.19a      | 2.35±2.15a      | 2.36±1.87a      | <i>P</i> =0.59       |
| T.BG5             | 3.56±2.74a       | 3.48±2.15a      | 4.15±2.31a       | 4.23±2.62a      | 3.66±2.42a      | 4.16±2.42a      | 3.47±2.33a      | <i>P</i> =0.69       |
| SMC               | 38.53±3.45a      | 37.28±2.38a     | 36.78±2.82a      | 37.55±2.35a     | 33.81±2.59b     | 37.34±3.28a     | 36.24±2.84a     | <i>P</i> =0.96       |
| SOM               | 227.18±25.04a    | 233.42±19.38a   | 231.51±20.33a    | 226.48±19.81a   | 215.92±27.79a   | 228.49±18.11a   | 225.11±26.58a   | <i>P</i> =0.73       |
| SBD               | 0.97±0.15a       | 0.91±0.12a      | 0.94±0.12a       | 0.97±0.15a      | 0.94±0.13a      | 0.92±0.14a      | 0.98±0.12a      | <i>P</i> =0.07       |
| Shannon           | 2.91±0.19a       | 2.67±0.13ab     | 2.79±0.19a       | 2.76±0.16ab     | 2.54±0.44b      | 2.77±0.27a      | 2.69±0.27a      | <i>P</i> =0.64       |
| Simpson           | 0.93±0.03a       | 0.89±0.02ab     | 0.91±0.02a       | 0.91±0.02a      | 0.86±0.09b      | 0.91±0.06a      | 0.9±0.04a       | <i>P</i> =0.59       |
| Pielou            | 0.89±0.05a       | 0.85±0.03a      | 0.87±0.03a       | 0.87±0.02a      | 0.84±0.09a      | 0.86±0.06a      | 0.86±0.05a      | <i>P</i> =0.37       |
| PD                | 1588.84±134.65a  | 1468.66±160.35a | 1499.99±145.57a  | 1506.37±250.12a | 1286.44±244.01b | 1532.61±183.78a | 1407.51±221.58b | <b><i>P</i>=0.03</b> |
| PE                | 72.17±45.20a     | 61.08±44.45a    | 63.07±36.68a     | 53.91±17.71a    | 43.33±15.49a    | 56.29±18.23a    | 61.12±45.48a    | <i>P</i> =0.06       |
| PSV               | 0.87±0.01b       | 0.87±0.01b      | 0.87±0.01b       | 0.87±0.01b      | 0.88±0.01a      | 0.87±0.01a      | 0.87±0.01a      | <i>P</i> =0.79       |
| Bacterial.shannon | 8.96±0.22ab      | 8.87±0.19b      | 9.08±0.23a       | 8.87±0.13b      | 9.07±0.09a      | 8.98±0.24a      | 8.96±0.13a      | <i>P</i> =0.14       |
| Bacterial.PD      | 49.62±6.66ab     | 52.14±4.46a     | 53.94±6.32a      | 44.84±2.26b     | 49.42±3.63ab    | 50.27±6.42a     | 49.72±4.92a     | <i>P</i> =0.14       |
| Fungi.shannon     | 6.56±0.45a       | 6.38±0.66a      | 6.30±0.64a       | 6.14±0.63a      | 6.59±0.38a      | 6.15±0.48a      | 6.64±0.55b      | <i>P</i> =0.35       |
| Fungi.PD          | 50.36±5.72a      | 49.00±8.82a     | 48.05±7.13a      | 51.43±11.24a    | 52.09±9.33a     | 47.34±8.69a     | 53.03±7.27b     | <i>P</i> =0.16       |
| AGB               | 536.76±73.96a    | 550.57±101.13a  | 560.99±68.89a    | 505.62±98.22a   | 507.03±99.59a   | 529.32±75.42a   | 535.08±101.75a  | <i>P</i> =0.28       |
| BGB               | 834.48±319.59b   | 1229.95±337.54a | 1170.11±394.93ab | 881.85±254.04b  | 872.17±186.66b  | 993.13±220.02a  | 1002.29±431.79a | <i>P</i> =0.58       |
| AGB/Total.biomass | 0.40±0.08a       | 0.32±0.05b      | 0.35±0.05ab      | 0.35±0.07ab     | 0.36±0.05ab     | 0.35±0.05a      | 0.36±0.08a      | <i>P</i> =0.98       |
| BGB1              | 736.21±320.92b   | 1111.83±342.67a | 1044.09±339.87ab | 778.99±237.13b  | 773.89±204.27b  | 884.88±211.02a  | 893.13±411.26a  | <i>P</i> =0.51       |
| BGB2              | 65.78±21.53a     | 80.13±33.28a    | 91.19±59.68a     | 57.45±19.25a    | 68.17±23.59a    | 68.10±24.69a    | 76.99±43.73a    | <i>P</i> =0.47       |
| BGB3              | 32.57±14.93a     | 38.02±9.29a     | 34.99±8.82a      | 45.69±30.21a    | 29.89±6.57a     | 40.13±21.32a    | 32.33±8.88a     | <i>P</i> =0.91       |
| Total.biomass     | 1371.24±346.66b  | 1780.53±400.97a | 1731.10±448.58ab | 1387.46±244.95b | 1379.20±253.34b | 1522.44±236.56a | 1537.37±492.69a | <i>P</i> =0.46       |
| Com.stability     | 0.98±0.11b       | 1.33±0.47a      | 1.03±0.14b       | 1.06±0.12b      | 1.02±0.24b      | 1.02±0.23a      | 1.15±0.30a      | <i>P</i> =0.12       |

Values are mean±SD (n = 5). Different letters in the same column indicate a significant difference at *P* < 0.05 among the treatments. W×G indicates the interaction of warming and grazing, and the number in W×G indicates the significant p-value.

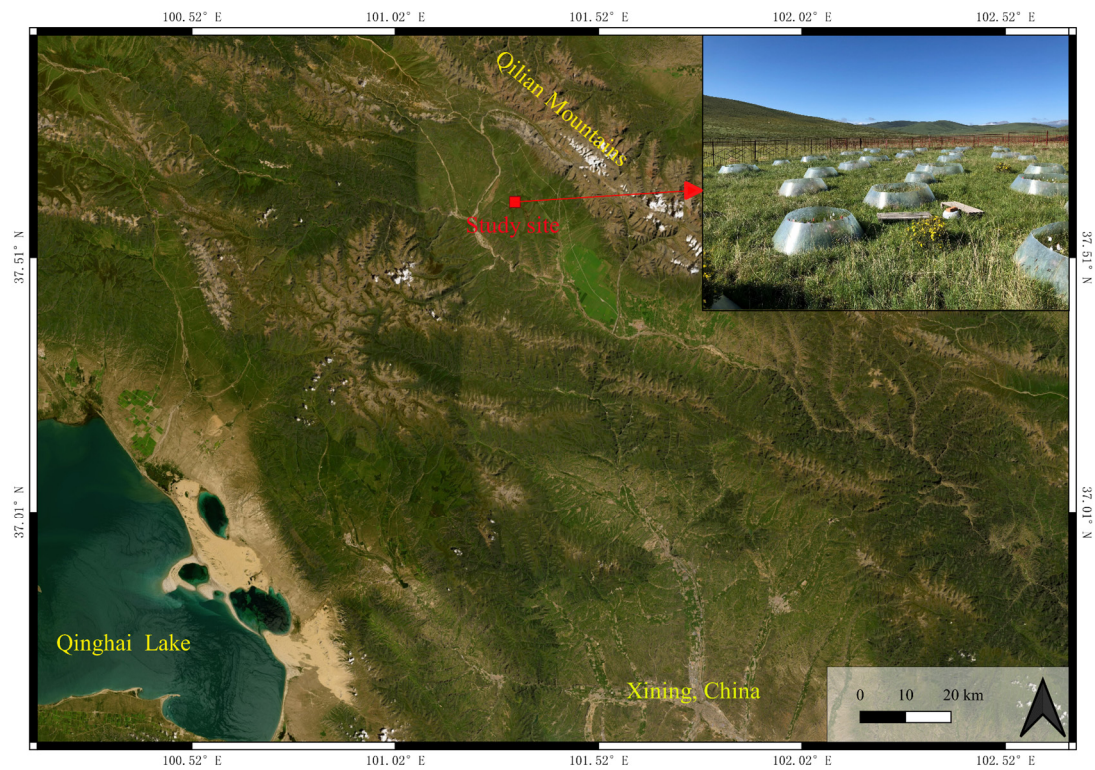

**Figure S1** Location of the study site (Haibei Alpine Meadow Ecosystem Research Station) on the Qinghai-Tibet Plateau, China.

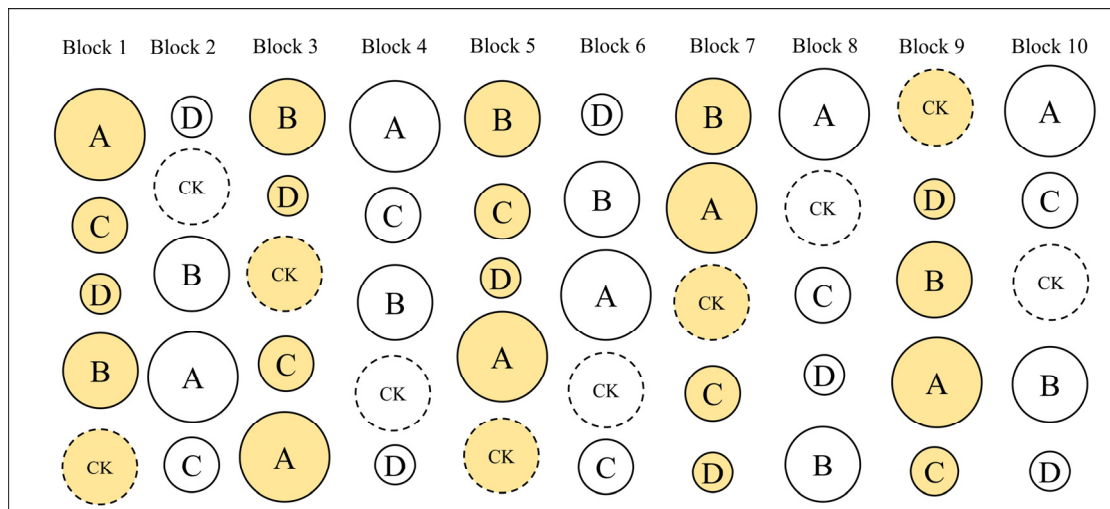

**Figure S2** Schematic diagram of the experimental treatment design. This field experimental system of warming and grazing at the Haibei experimental Station of Northwest Institute of Plateau Biology, Chinese Academy of Sciences. Fifty plots composed of five temperature treatments (ambient temperature and four warming treatments) with ten replicates were distributed in 10 rows by 5 columns with a random block design. Each plot was separated from the others by a 2-m buffer strip. Half blocks with yellow mark were treated as stimulated grazing by clipping 60% standing litters before the growing season every year, and the remaining half were non clipping. Four levels of warming treatments were achieved by installing four types of conical open top

chambers (OTCs) constructed of 1.0 mm thick fiberglass.

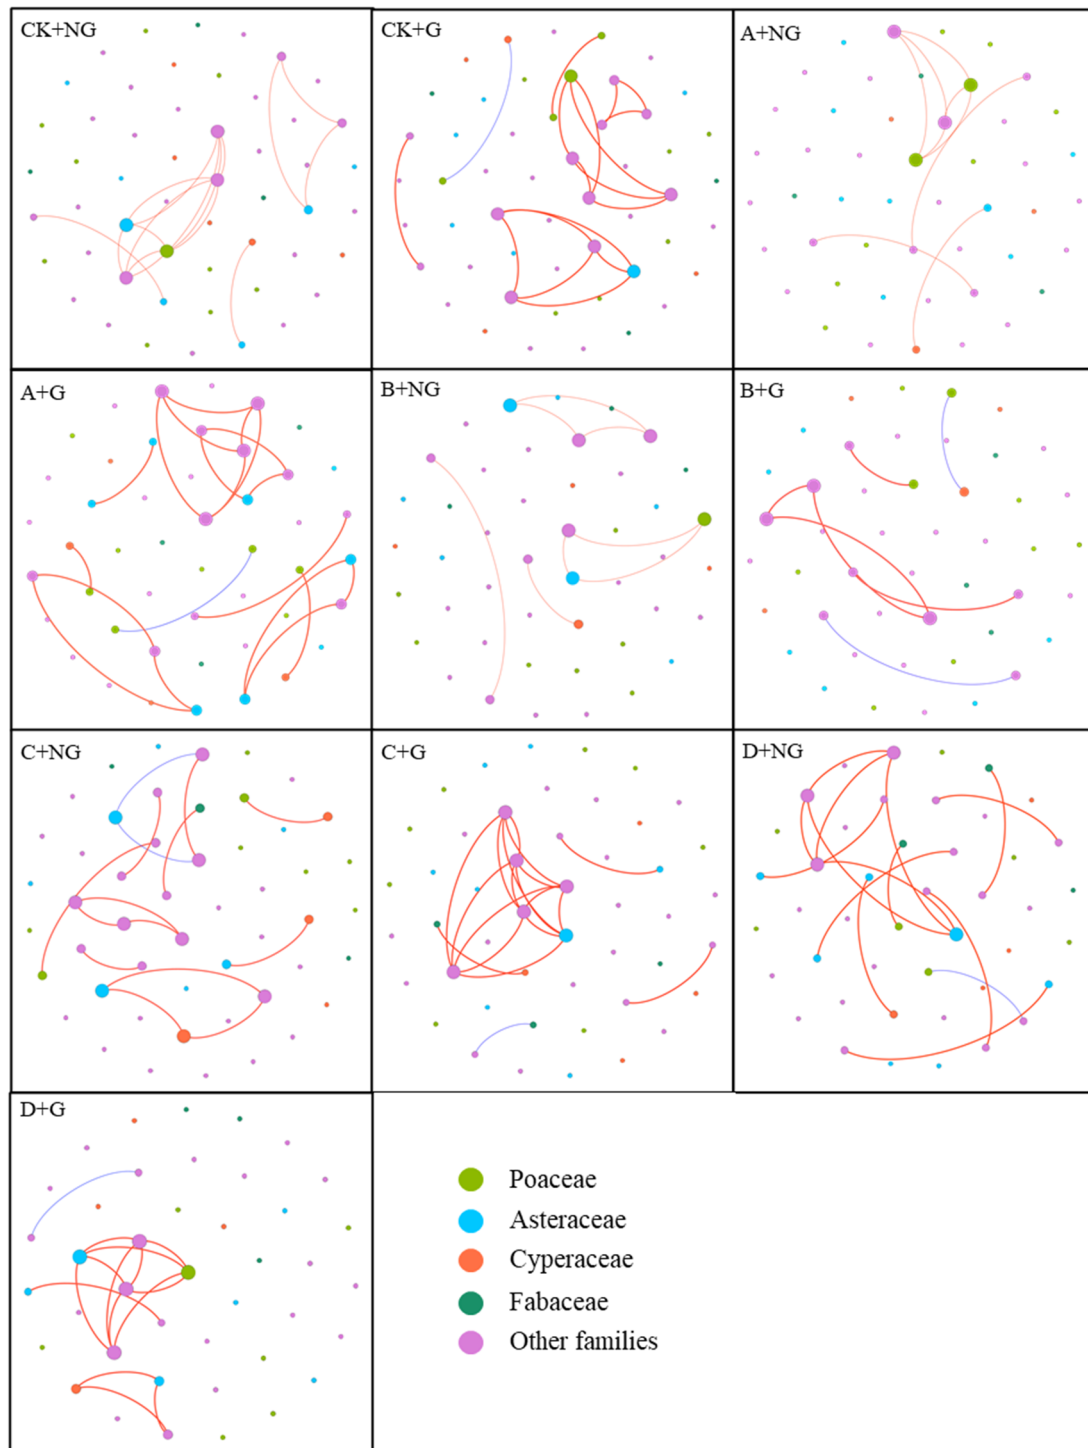

**Figure S3** Network co-occurrence analysis of plant communities. The dots indicate species in the plant community, different colored dots indicate different plant functional groups. Lines indicate interrelationships between species, with red lines indicating positive correlations and blue lines indicating negative correlations.

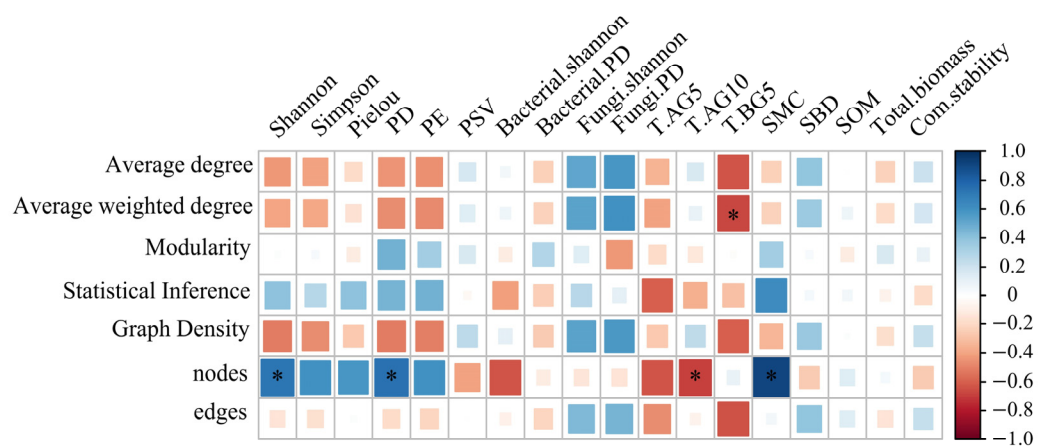

**Figure S4** Correlation of co-occurrence network analysis results with biodiversity and ecosystem function
